# Supplementary material for: Ir nanoparticles decorated NiFe metal–organic framework as a highly efficient and stable heterostructure electrocatalyst for overall seawater splitting
Source: Royal Society of Chemistry journal article supplement (doi:10.1039/d4ta06515h), 2024-01-01
Supplement: d4ta06515h1.pdf [file d4ta06515h1.pdf]

## Electronic Supplementary Information

### Experimental section

**Materials:** Iron(III) chloride ( $\text{FeCl}_3$ ), terephthalic acid ( $\text{C}_8\text{H}_6\text{O}_4$ ), N, N-dimethylformamide (DMF), disodium phosphate anhydrous ( $\text{Na}_2\text{HPO}_4$ ), potassium phosphate monobasic ( $\text{KH}_2\text{PO}_4$ ), ethylenediaminetetraacetic acid disodium, potassium hydroxide (KOH), sodium hydroxide (NaOH), and N, N-diethyl-p-phenylenediamine (DPD) were obtained from Shanghai Maclin Biochemical Technology Co., Ltd. Urea, iridium(III) chloride ( $\text{IrCl}_3$ ), sodium chloride (NaCl), sodium carbonate ( $\text{Na}_2\text{CO}_3$ ), ruthenium oxide ( $\text{RuO}_2$ ), Pt/C (20 wt.% Pt on Vulcan XC-72R), and Nafion (5 wt.%) were bought from Aladdin Ltd. (Shanghai, China). Nickel nitrate hexahydrate ( $\text{Ni}(\text{NO}_3)_2 \cdot 6\text{H}_2\text{O}$ ) was obtained from the Tianjin Damao chemical reagent factory. Acetone, ethanol, potassium permanganate ( $\text{KMnO}_4$ ), sulfuric acid ( $\text{H}_2\text{SO}_4$ ), and hydrochloric acid (HCl) were purchased from Beijing Chemical Reagent Co., Ltd (Beijing, China). Natural seawater was procured from Qingdao, Shandong, China. Before utilization, most magnesium and calcium salts were eliminated by adding  $\text{Na}_2\text{CO}_3$  to the natural seawater. Ni foam (NF) was obtained from Shenzhen Green and Creative Environmental Science and Technology Co., Ltd. The study employed ultrapure water throughout.

**Preparation of NiFe-MOF/NF:** The NF ( $2.0 \times 3.0 \text{ cm}^2$ ) was initially subjected to sonication in HCl, ethanol, and water for 15 minutes each. Solution A is made by mixing  $\text{Ni}(\text{NO}_3)_2 \cdot 6\text{H}_2\text{O}$  (291 mg) and  $\text{FeCl}_3$  (81 mg) in 30 ml of distilled water. Terephthalic acid (16.6 mg) was dissolved in 9 ml of DMF as solution B. Then, solutions A and B should be combined and stirred for 30 minutes. The pretreated NF was put into the mixed solution in a Teflon-lined autoclave and heated at  $150 \text{ }^\circ\text{C}$  for 6 h to get NiFe-MOF/NF. Then, it was taken out, washed with water, and dried at  $60 \text{ }^\circ\text{C}$  for 2 h.

**Preparation of Ir@NiFe-MOF/NF:** Dissolve  $\text{IrCl}_3$  (26.8 mg) in 30 ml water at  $80 \text{ }^\circ\text{C}$ . Subsequently, the precursor NiFe-MOF/NF was introduced into a reactor with the  $\text{IrCl}_3$  solution and heated at  $80 \text{ }^\circ\text{C}$  for 12 h. Allow the reactor to cool, then remove the

material to wash and dry to obtain Ir@NiFe-MOF/NF.

**Preparation of RuO<sub>2</sub>/NF and Pt/C/NF:** RuO<sub>2</sub> (5 mg) was added to a solution containing Nafion (20 μL), ethanol (490 μL), and water (490 μL) with the aid of ultrasonication (30 min) to form a homogeneous ink (5 mg mL<sup>-1</sup>). Catalyst ink (100 μL) was then dropped onto a piece of cleaned NF (0.5 × 0.5 cm<sup>2</sup>) with a loading mass of 2.0 mg cm<sup>-2</sup>. Pt/C/NF was prepared in the same way as RuO<sub>2</sub>/NF.

**Characterizations:** X-ray diffraction (XRD) data were obtained using a Philip D8 apparatus with a Cu Kα source (λ = 1.54056 Å). Raman spectroscopy was recorded on the Lab RAM HR Evolution confocal microscope with a 532 nm laser. To examine the morphology and composition of the samples, a scanning electron microscope (SEM, ZISS 300) equipped with energy dispersive X-ray (EDX) facility, a transmission electron microscope (TEM, JEM-F200, JEOL Ltd.) and X-ray photoelectron spectroscopy (XPS, ESCALAB 250 Xi) was utilized.

**Electrochemical measurements:** All electrochemical tests were conducted using the CHI 660E and 1140C electrochemical workstations. The working electrodes were prepared as described previously and were 0.5 × 0.5 cm<sup>2</sup> in size. The Hg/HgO and graphite rod were used as the reference and counter electrodes. Three distinct electrolytes were employed, comprising 1 M KOH, 1 M KOH + 0.5 M NaCl, and 1 M KOH + seawater, with a pH value of approximately 14.0. All measured potentials were converted to potentials relative to the reversible hydrogen electrode (RHE) following the Nernst equation ( $E_{\text{RHE}} = E_{\text{Hg/HgO}} + 0.059 \times \text{pH} + 0.098 \text{ V}$ ). The Tafel slope was determined through the application of the Tafel equation. Tafel equation:  $\eta = b \log j + a$ , where  $\eta$  is overpotential,  $j$  is the current density (mA cm<sup>-2</sup>), and  $b$  is the Tafel slope (mV dec<sup>-1</sup>). Electrochemical impedance spectroscopy measurements were conducted over a frequency range of 10<sup>5</sup> to 0.01 Hz with an amplitude of 5 mV. The double-layer capacitance ( $C_{\text{dl}}$ ) values were obtained utilizing cyclic voltammetry (CV) curves with a scan rate of 20–100 mV s<sup>-1</sup>. The measured solution resistance was corrected for the iR compensation potential according to equation:  $E_{\text{corr.}} = E - iR \times 0.85$ , where  $E$  is the original potential,  $R$  is the solution resistance, and  $i$  is the

corresponding current. All data (except for Figs. 3d, 3e, 3f, 3h, 4d, 4e, 4h, S4, S5, S11, S15, and S16) have been reported with iR compensation.

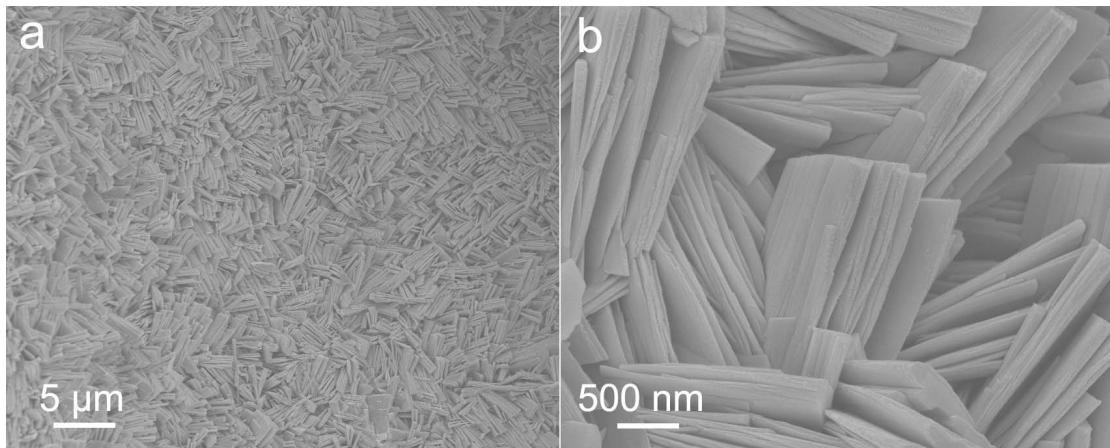

**Fig. S1.** (a) Low- and (b) high-magnification SEM images of NiFe-MOF/NF.

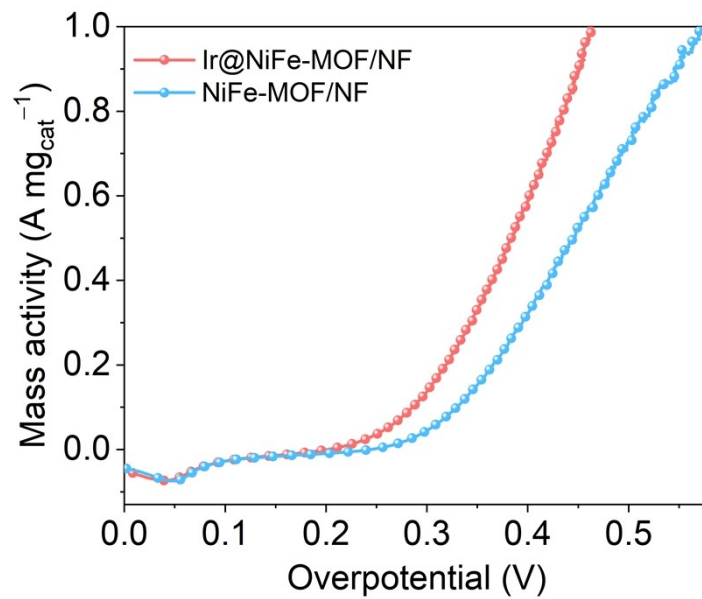

**Fig. S2.** Mass-normalized LSV curves of Ir@NiFe-MOF/NF and NiFe-MOF/NF in 1 M KOH for OER.

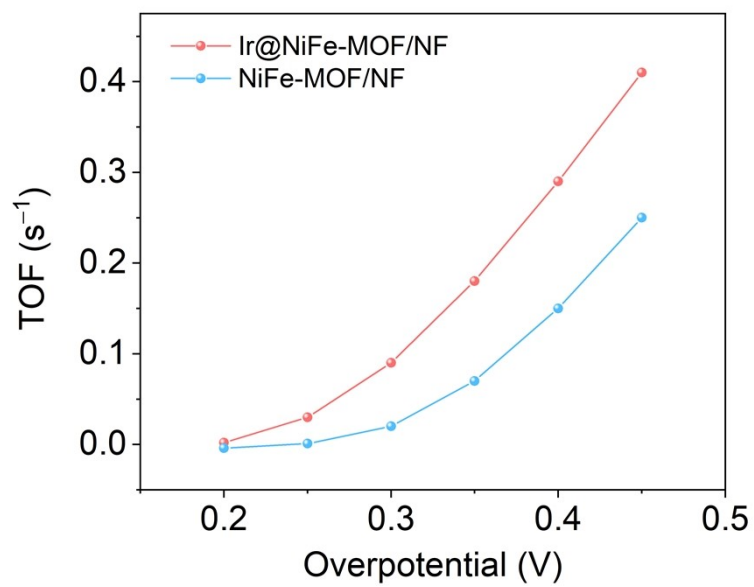

**Fig. S3.** TOF plots of Ir@NiFe-MOF/NF and NiFe-MOF/NF in 1 M KOH for OER.

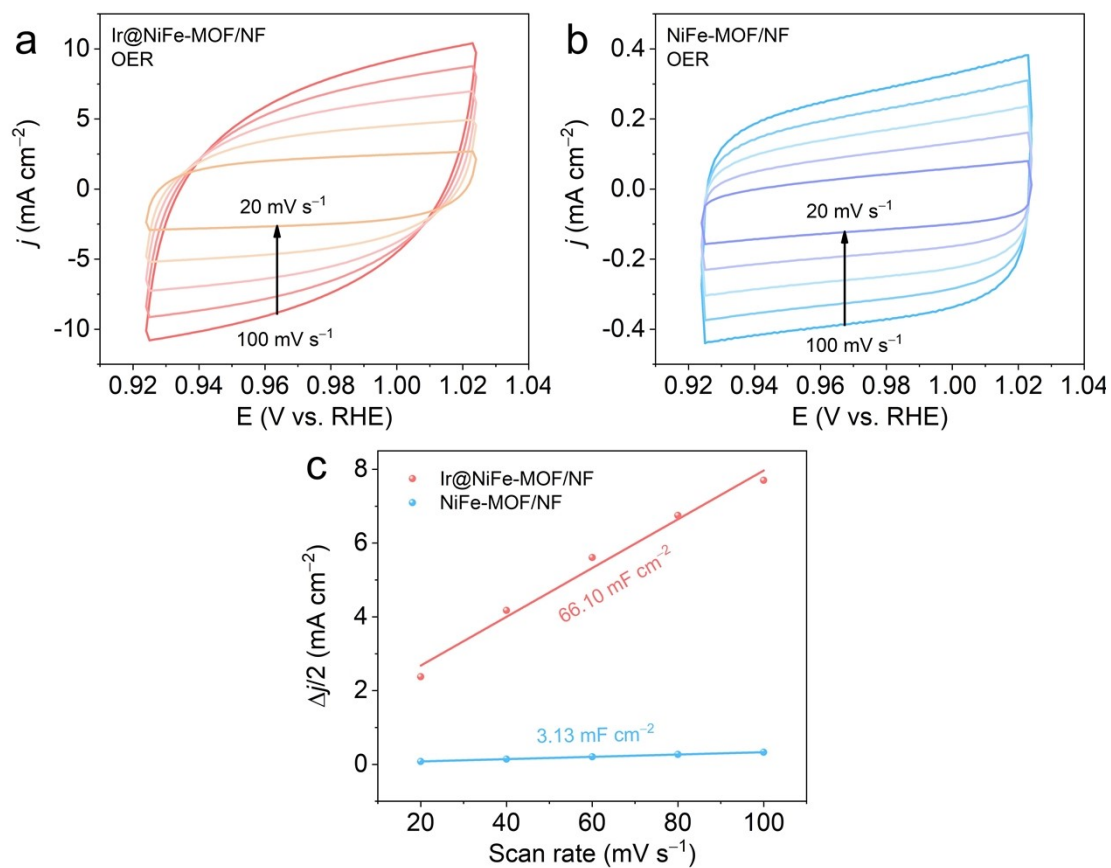

**Fig. S4.** CV curves of (a) Ir@NiFe-MOF/NF and (b) NiFe-MOF/NF in the double layer region at different scan rates of 20, 40, 60, 80, and 100 mV s<sup>-1</sup> in 1 M KOH, and (c)  $C_{dl}$  values of as-prepared samples for OER.

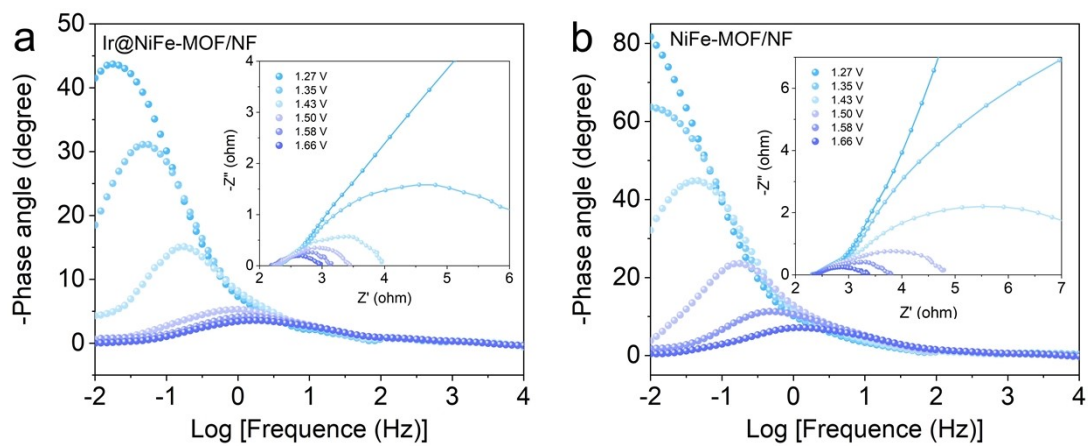

**Fig. S5.** Operando Nyquist plots and the corresponding Bode phase plots of (a) Ir@NiFe-MOF/NF and (b) NiFe-MOF/NF at different potentials (vs. RHE) for OER.



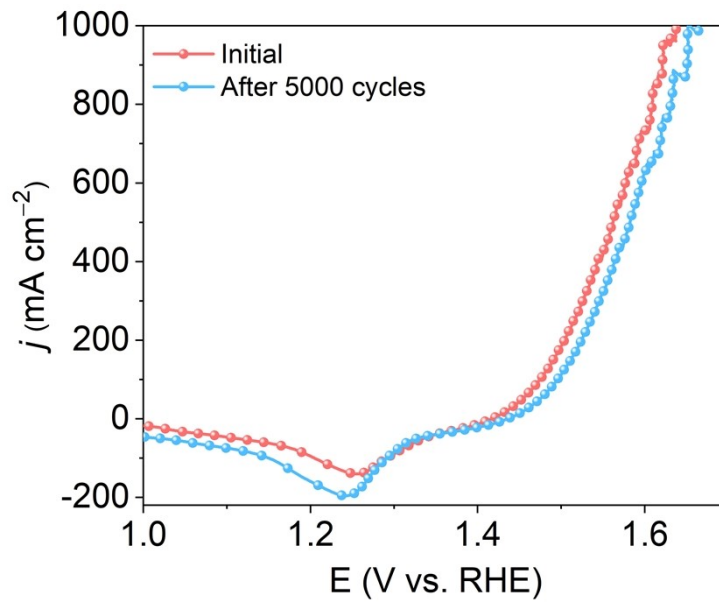

**Fig. S6.** LSV curves of Ir@NiFe-MOF/NF before and after 5000 CV cycles in 1 M KOH for OER.

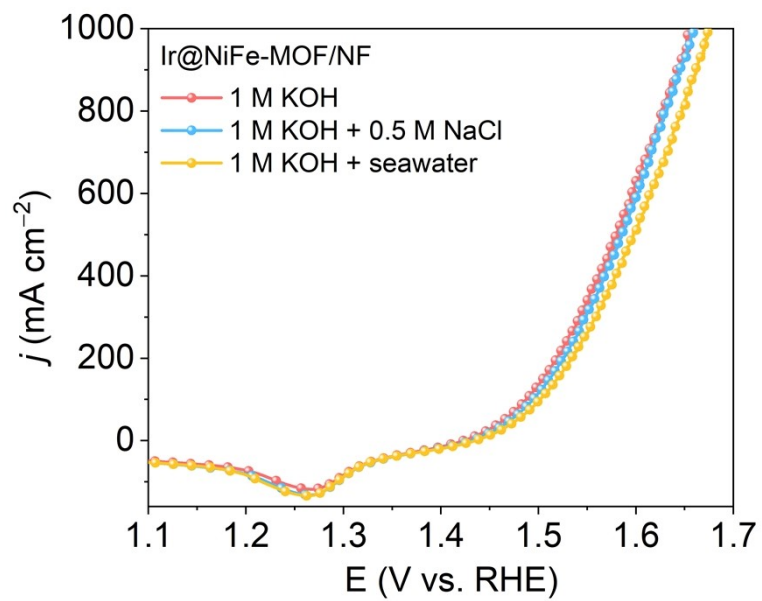

**Fig. S7.** The LSV curves for the Ir@NiFe-MOF/NF electrode tested in different electrolytes.

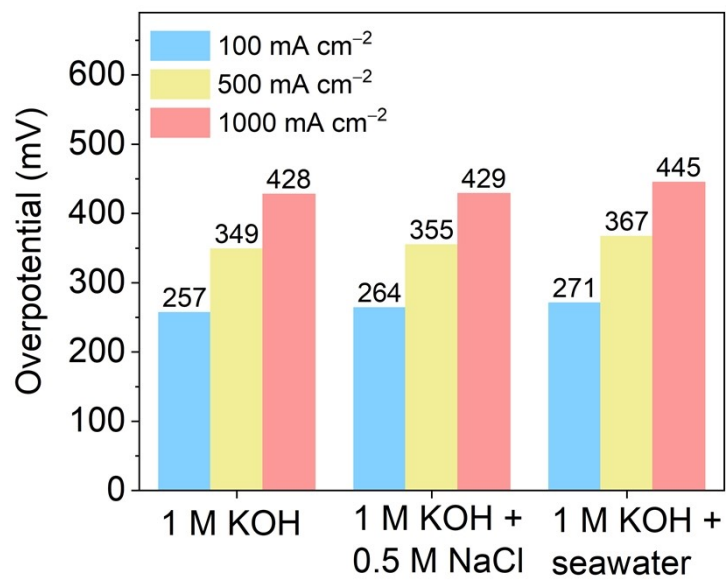

**Fig. S8.** The corresponding overpotentials for the Ir@NiFe-MOF/NF electrode tested in different electrolytes.

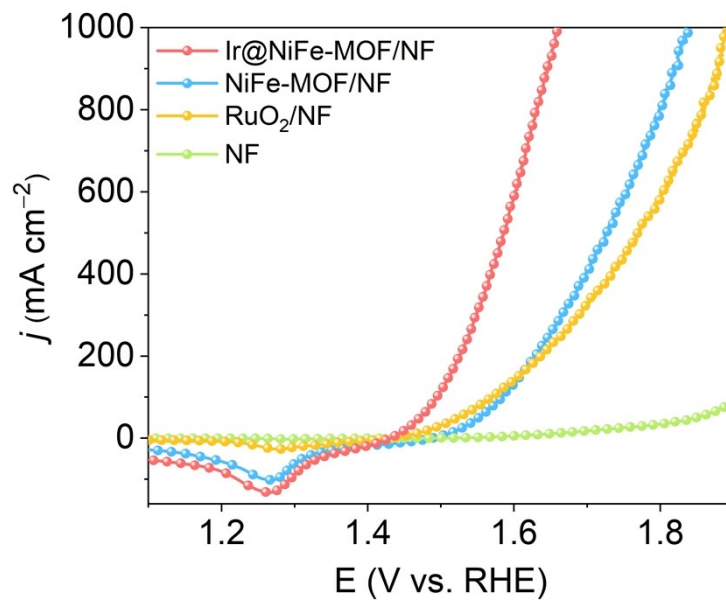

**Fig. S9.** LSV curves of different catalysts in 1 M KOH + seawater for OER.

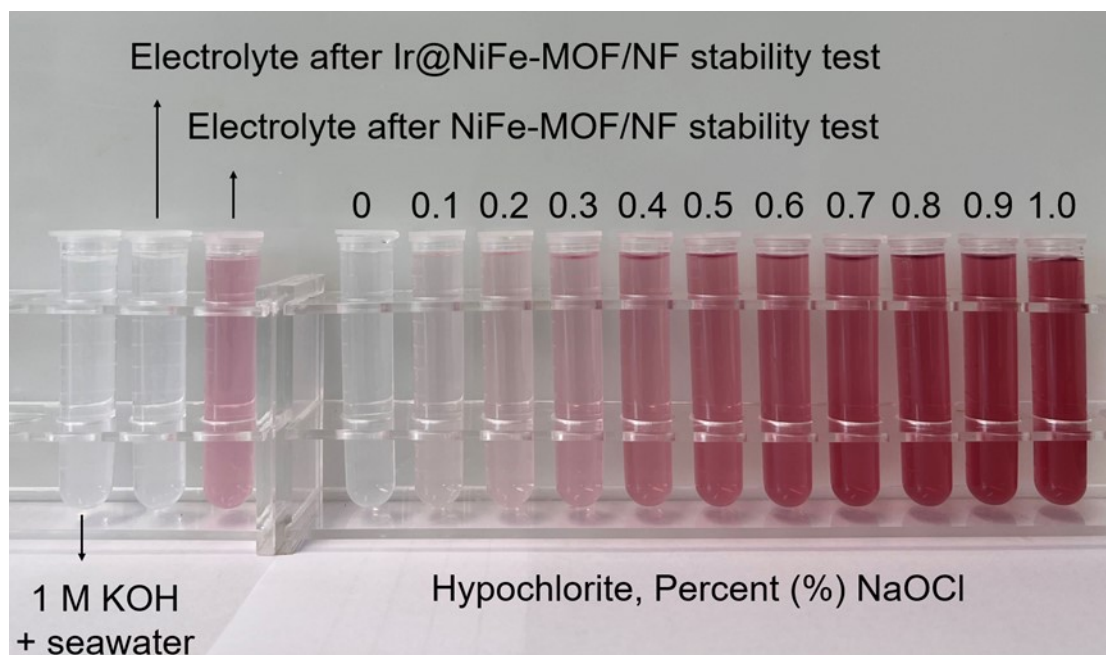

**Fig. S10.** Hypochlorite detection for the 1 M KOH + seawater electrolyte after stability test.

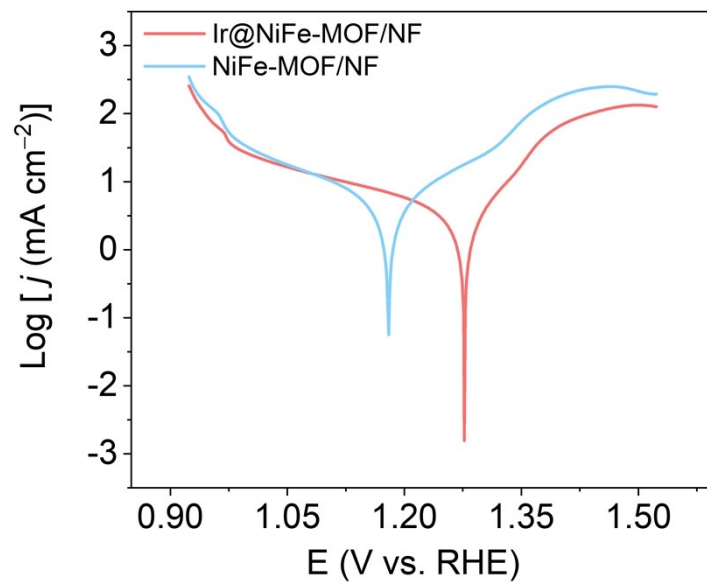

**Fig. S11.** Tafel plots of Ir@NiFe-MOF/NF and NiFe-MOF/NF in 1 M KOH + seawater.

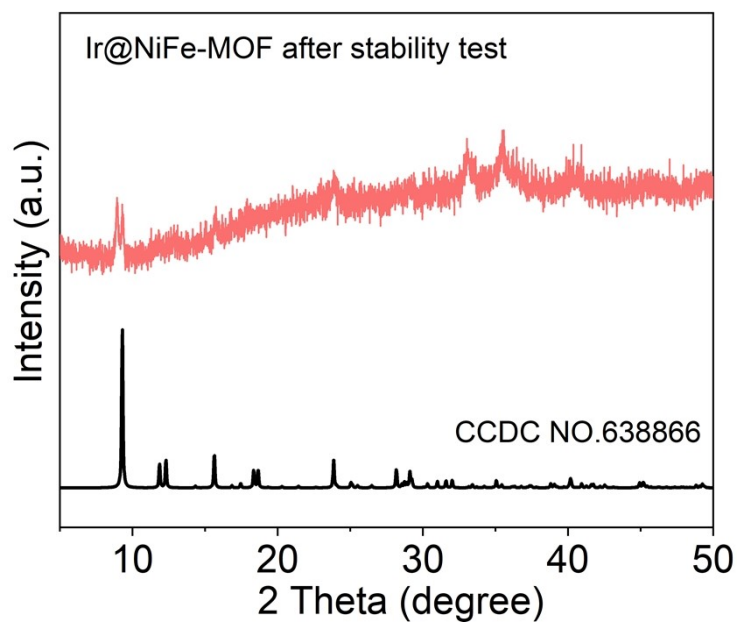

**Fig. S12.** XRD pattern of Ir@NiFe-MOF after OER stability test.

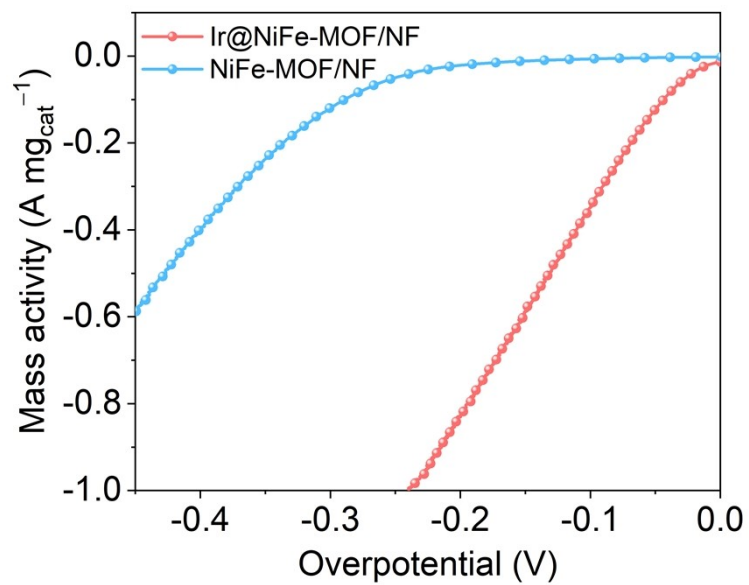

**Fig. S13.** Mass-normalized LSV of Ir@NiFe-MOF/NF and NiFe-MOF/NF in 1 M KOH for HER.



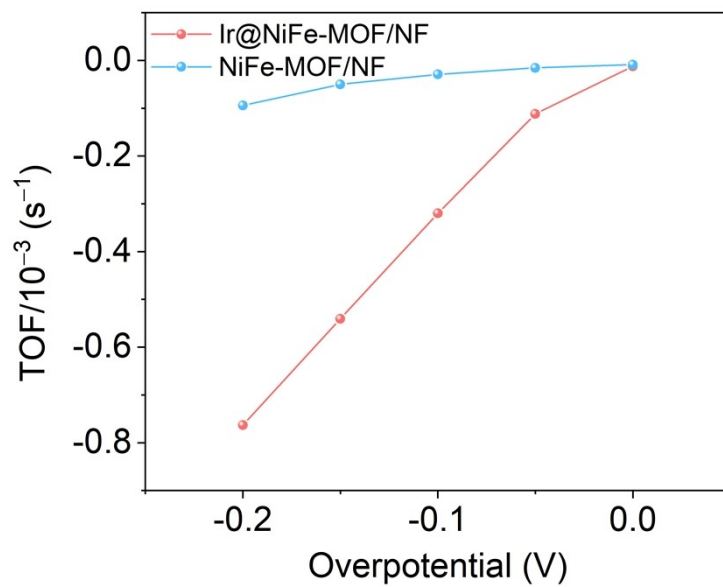

**Fig. S14.** TOF plots of Ir@NiFe-MOF/NF and NiFe-MOF/NF in 1 M KOH for HER.

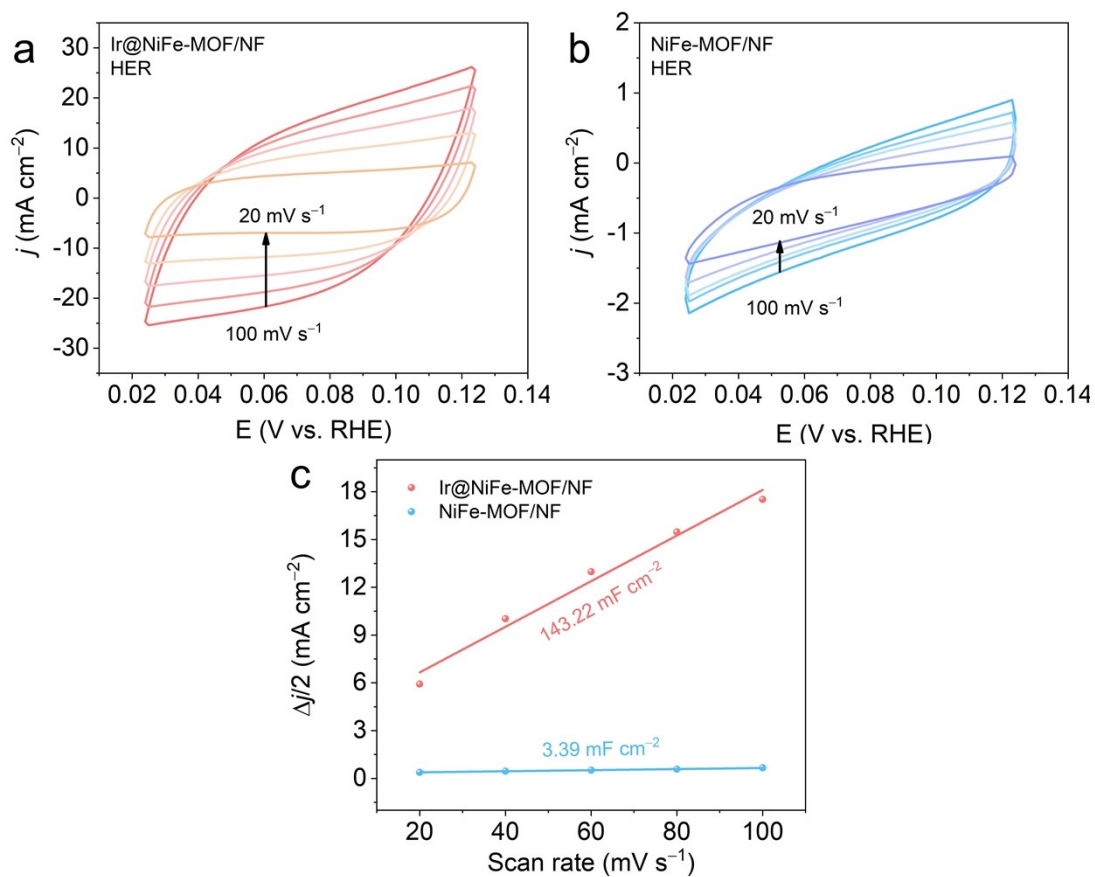

**Fig. S15.** CV curves of (a) Ir@NiFe-MOF/NF and (b) NiFe-MOF/NF in the double layer region at different scan rates of 20, 40, 60, 80, and 100  $\text{mV s}^{-1}$  in 1 M KOH, and (c)  $C_{dl}$  values of as-prepared samples for HER.

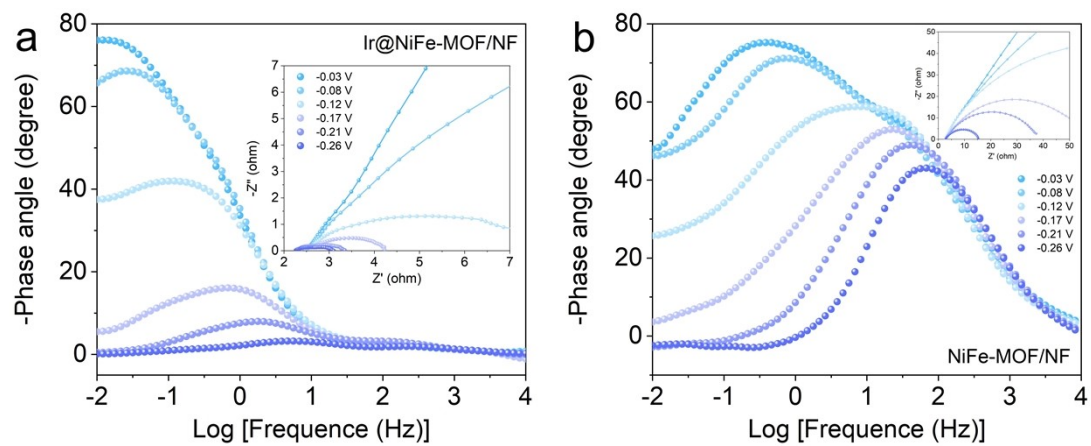

**Fig. S16.** Operando Nyquist plots and the corresponding Bode phase plots of (a) Ir@NiFe-MOF/NF and (b) NiFe-MOF/NF at different potentials (vs. RHE) for HER.

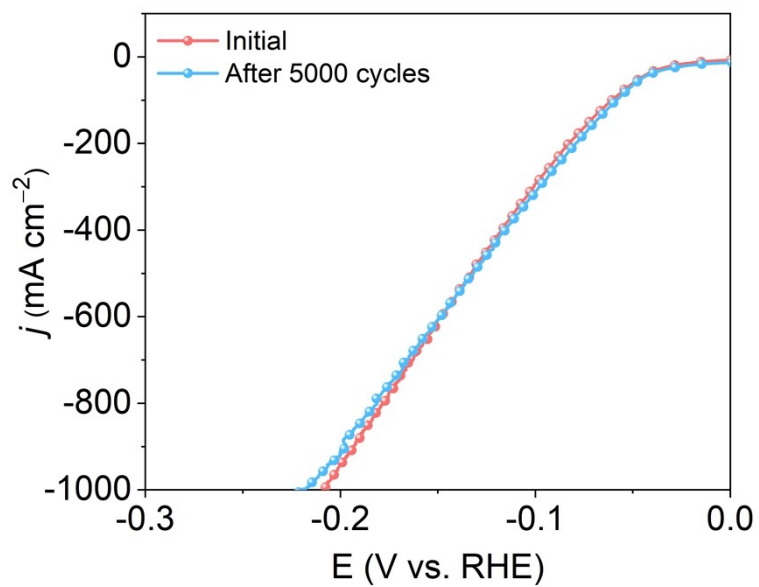

**Fig. S17.** The LSV curves of Ir@NiFe-MOF/NF before and after 5000 CV cycles in 1 M KOH electrolyte.

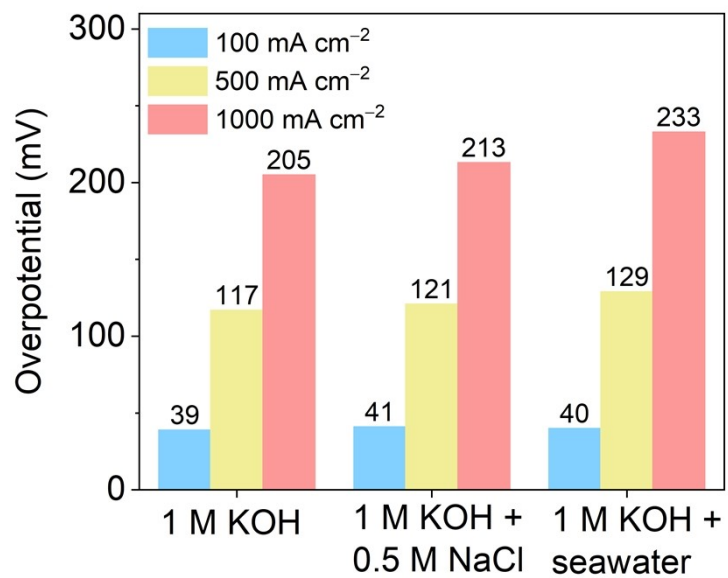

**Fig. S18.** The HER overpotentials for the Ir@NiFe-MOF/NF electrode tested in different electrolytes.

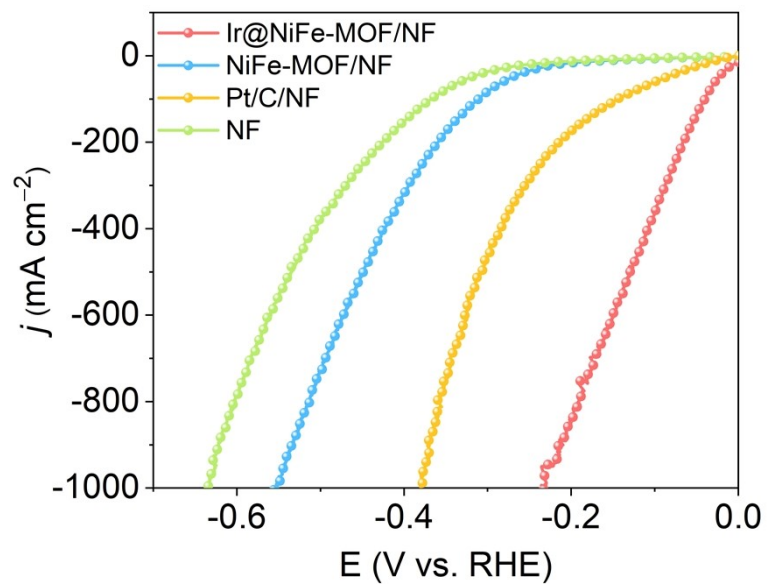

**Fig. S19.** LSV curves of different catalysts in 1 M KOH + seawater for HER.

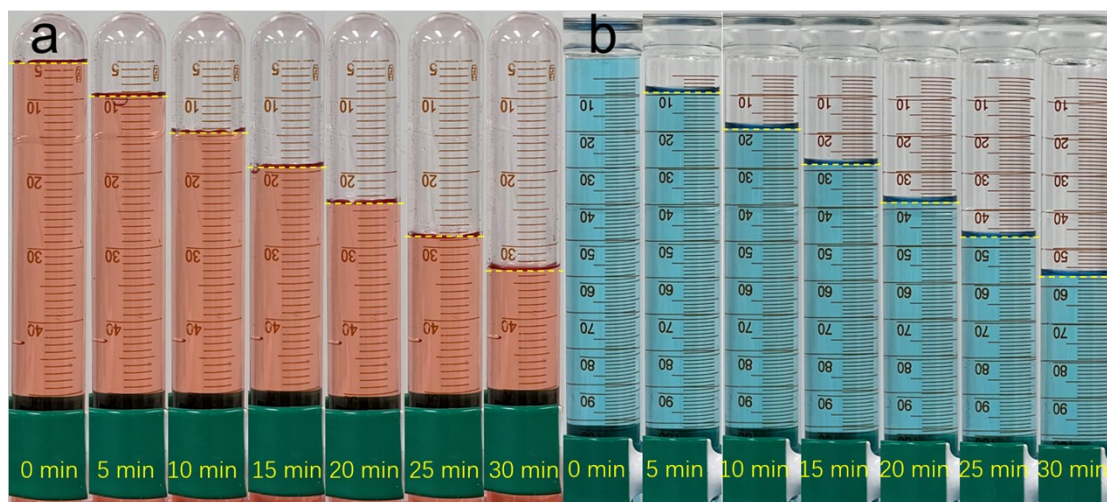

**Fig. S20.** The gas photographs of (a)  $O_2$  and (b)  $H_2$  varying with time at  $1000 \text{ mA cm}^{-2}$  by drainage method in  $1 \text{ M KOH} + \text{seawater}$ .

**Table S1.** Element analysis of Ir@NiFe-MOF and NiFe-MOF by ICP-OES.

| Element concentration (mg/L) | Ir@NiFe-MOF | NiFe-MOF |
|------------------------------|-------------|----------|
| Ni                           | 0.184       | 0.212    |
| Fe                           | 0.043       | 0.059    |
| Ir                           | 0.433       | —        |



**Table S2.** Comparison of the OER performance of Ir@NiFe-MOF/NF with other reported OER electrocatalysts.

| Catalysts                                                                   | Electrolyte               | Current density (mA cm <sup>-2</sup> ) | Overpotential (mV) | Ref.                                                               |
|-----------------------------------------------------------------------------|---------------------------|----------------------------------------|--------------------|--------------------------------------------------------------------|
| <b>Ir@NiFe-MOF/NF</b>                                                       | <b>1 M KOH + seawater</b> | <b>100</b>                             | <b>271</b>         | <b>This work</b>                                                   |
|                                                                             |                           | <b>500</b>                             | <b>367</b>         |                                                                    |
|                                                                             |                           | <b>1000</b>                            | <b>445</b>         |                                                                    |
| Au/Cr-NiFe/GC                                                               | 1 M KOH                   | 10                                     | 323                | <i>J. Mater. Chem. A</i> , <b>2019</b> , 7, 9690–9697              |
| NiFe(OH) <sub>x</sub> @Ni <sub>3</sub> S <sub>2</sub> /MoS <sub>2</sub> -CC | 1 M KOH                   | 100                                    | 309                | <i>J. Mater. Chem. A</i> , <b>2019</b> , 7, 2895–2900              |
| Fe-NiCo <sub>2</sub> O <sub>4</sub> /NF                                     | 1 M KOH                   | 100                                    | 350                | <i>Appl. Surf. Sci.</i> , <b>2017</b> , 416, 371–378               |
| Ni <sub>0.3</sub> Fe <sub>0.7</sub> -LDH@NF                                 | 1 M KOH                   | 100                                    | 256                | <i>Appl. Catal. B</i> , <b>2023</b> , 323, 122091                  |
| NRAHM-NiO/NF                                                                | 1 M KOH + seawater        | 100                                    | 340                | <i>ACS Catal.</i> , <b>2023</b> , 13, 5516–5528                    |
| NiPS/NF                                                                     | 1 M KOH + seawater        | 500                                    | 392                | <i>J. Energy Chem.</i> , <b>2022</b> , 75, 66–73                   |
| NiNS/NF                                                                     | 1 M KOH + seawater        | 100                                    | 404                | <i>J. Mater. Chem. A</i> , <b>2019</b> , 7, 8117–8121              |
| NiCoHPi@Ni <sub>3</sub> N/NF                                                | 1 M KOH + seawater        | 100                                    | 396                | <i>ACS Appl. Mater. Interfaces</i> , <b>2022</b> , 14, 22061–22070 |
|                                                                             |                           | 500                                    | 474                |                                                                    |
| RuNi-Fe <sub>2</sub> O <sub>3</sub> /IF                                     | 1 M KOH + seawater        | 1000                                   | 497                | <i>Chin. J. Catal.</i> , <b>2022</b> , 43, 2202–2211               |
| S-(Ni,Fe)OOH/NF                                                             | 1 M KOH + seawater        | 100                                    | 300                | <i>Energy Environ. Sci.</i> , <b>2020</b> , 13, 3439–3446          |
|                                                                             |                           | 500                                    | 398                |                                                                    |
|                                                                             |                           | 1000                                   | 462                |                                                                    |
| NiMoN@NiFeN/NF                                                              | 1 M KOH + seawater        | 100                                    | 307                | <i>Nat. Commun.</i> , <b>2019</b> , 10, 5106                       |
| NiCoS/NF                                                                    | 1 M KOH + seawater        | 10                                     | 280                | <i>Appl. Catal. B</i> , <b>2021</b> , 291, 120071                  |
|                                                                             |                           | 100                                    | 360                |                                                                    |
|                                                                             |                           | 500                                    | 440                |                                                                    |
| NiFe-LDH-6-4/CC                                                             | 1 M KOH + seawater        | 100                                    | 301                | <i>Mater. Today Energy</i> , <b>2021</b> , 22, 100883              |
| Ni <sub>3</sub> N@C/NF                                                      | 1 M KOH + seawater        | 100                                    | 314                | <i>J. Mater. Chem. A</i> , <b>2021</b> , 9, 13562–13569            |
| S-NiFeSe <sub>2</sub> /NF                                                   | 1 M KOH + seawater        | 100                                    | 367                | <i>Sci. China Chem.</i> , <b>2024</b> , 67, 2747–2754              |
| NiCo-EDA/GC                                                                 | 1 M KOH + seawater        | 100                                    | 670                | <i>Electrochim. Acta</i> , <b>2017</b> , 247, 381–391              |
| Cr-Co <sub>x</sub> P/NF                                                     | 1 M KOH + seawater        | 100                                    | 334                | <i>Adv. Funct. Mater.</i> , <b>2023</b> , 33, 2214081              |
| MoN-Co <sub>2</sub> N/GC                                                    | 1 M KOH + seawater        | 100                                    | 357                | <i>ACS Appl. Mater. Interfaces</i> , <b>2022</b> , 14, 41924–41933 |
|                                                                             |                           | 500                                    | 432                |                                                                    |

|                                  |                       |      |     |                                                            |
|----------------------------------|-----------------------|------|-----|------------------------------------------------------------|
| CoSe <sub>2</sub> -<br>NCF/CC    | 1 M KOH +<br>seawater | 100  | 455 | <i>Inorg. Chem. Commun.</i> ,<br><b>2022</b> , 146, 110170 |
| Ni(OH) <sub>2</sub> -<br>TCNQ/GP | 1 M KOH +<br>seawater | 100  | 382 | <i>Nano Res.</i> , <b>2022</b> , 15,<br>6084–6090          |
|                                  |                       | 500  | 542 |                                                            |
| S-Cu <sub>2</sub> O-<br>CuO/CF   | 1 M KOH +<br>seawater | 100  | 320 | <i>Catal. Today</i> , <b>2022</b> ,<br>400–401, 14–25      |
|                                  |                       | 500  | 440 |                                                            |
| RuMoNi/NF                        | 1 M KOH +<br>seawater | 1000 | 484 | <i>Nat. Commun.</i> , <b>2023</b> ,<br>14, 3607            |
| RuV-<br>CoNiP/NF                 | 1 M KOH +<br>seawater | 100  | 318 | <i>J. Mater. Chem. A</i> ,<br><b>2021</b> , 9, 26852–26860 |
| NiFe-PBA-gel-<br>cal/GC          | 1 M KOH +<br>seawater | 100  | 329 | <i>Adv. Sci.</i> , <b>2022</b> , 9,<br>2200146             |

**Table S3.** Corrosion potential ( $E_{\text{corr.}}$ ) and corrosion current density ( $j_{\text{corr.}}$ ) values of Ir@NiFe-MOF/NF and NiFe-MOF/NF.

| Catalysts      | $E_{\text{corr.}}$ (V vs. RHE) | $j_{\text{corr.}}$ (mA cm <sup>-2</sup> ) |
|----------------|--------------------------------|-------------------------------------------|
| Ir@NiFe-MOF/NF | 1.277                          | 3.234                                     |
| NiFe-MOF/NF    | 1.180                          | 3.982                                     |

**Table S4.** Comparison of the HER performance of Ir@NiFe-MOF/NF with other reported HER electrocatalysts.

| Catalysts                                                                   | Electrolyte               | Current density (mA cm <sup>-2</sup> ) | Overpotential (mV) | Ref.                                                               |
|-----------------------------------------------------------------------------|---------------------------|----------------------------------------|--------------------|--------------------------------------------------------------------|
| <b>Ir@NiFe-MOF/NF</b>                                                       | <b>1 M KOH + seawater</b> | <b>100</b>                             | <b>40</b>          | <b>This work</b>                                                   |
|                                                                             |                           | <b>500</b>                             | <b>129</b>         |                                                                    |
|                                                                             |                           | <b>1000</b>                            | <b>233</b>         |                                                                    |
| (Ni-Fe) <sub>x</sub> /NiFe(OH) <sub>y</sub> /NF                             | 1 M KOH                   | 100                                    | 124                | <i>Appl. Catal. B</i> , <b>2019</b> , 246, 337–348                 |
| NiFe(OH) <sub>x</sub> @Ni <sub>3</sub> S <sub>2</sub> /MoS <sub>2</sub> -CC | 1 M KOH                   | 100                                    | 173                | <i>J. Mater. Chem. A</i> , <b>2019</b> , 7, 2895–2900              |
| NiNS/NF                                                                     | 1 M KOH                   | 100                                    | 197                | <i>J. Mater. Chem. A</i> , <b>2019</b> , 7, 8117–8121              |
| MIL-(IrNiFe)/NF                                                             | 1 M KOH + seawater        | 100                                    | 79                 | <i>J. Mater. Chem. A</i> , <b>2021</b> , 9, 27424–27433            |
|                                                                             |                           | 500                                    | 179                |                                                                    |
|                                                                             |                           | 1000                                   | 235                |                                                                    |
| Pt-Ni@NiMoN/NF                                                              | 1 M KOH + seawater        | 10                                     | 11                 | <i>Energy Environ. Sci.</i> , <b>2023</b> , 16, 4584–4592          |
|                                                                             |                           | 100                                    | 47                 |                                                                    |
|                                                                             |                           | 500                                    | 109                |                                                                    |
| Pt-hcp Ni NBs/GC                                                            | 1 M KOH + seawater        | 10                                     | 137                | <i>ACS Appl. Mater. Interfaces</i> , <b>2023</b> , 15, 51160–51169 |
| NiS@FeNiP/NF                                                                | 1 M KOH + seawater        | 100                                    | 117                | <i>Small</i> <b>2023</b> , 19, 2300194                             |
|                                                                             |                           | 500                                    | 237                |                                                                    |
|                                                                             |                           | 1000                                   | 327                |                                                                    |
| Fe <sub>x</sub> -Ni&Ni <sub>0.2</sub> Mo <sub>0.8</sub> N/NF                | 1 M KOH + seawater        | 10                                     | 33                 | <i>Energy Environ. Sci.</i> , <b>2022</b> , 15, 3945–3957          |
|                                                                             |                           | 100                                    | 69                 |                                                                    |
|                                                                             |                           | 500                                    | 144                |                                                                    |
| Ni-SN@C/GC                                                                  | 1 M KOH + seawater        | 10                                     | 23                 | <i>Adv. Mater.</i> , <b>2021</b> , 33, 2007508                     |
| NiCoHPi@Ni <sub>3</sub> N/NF                                                | 1 M KOH + seawater        | 20                                     | 87                 | <i>ACS Appl. Mater. Interfaces</i> , <b>2022</b> , 14, 22061–22070 |
|                                                                             |                           | 100                                    | 182                |                                                                    |
|                                                                             |                           | 500                                    | 281                |                                                                    |
| RuNi-Fe <sub>2</sub> O <sub>3</sub> /IF                                     | 1 M KOH + seawater        | 1000                                   | 353                | <i>Chin. J. Catal.</i> , <b>2022</b> , 43, 2202–2211               |
| Ni-SA/NC                                                                    | 1 M KOH + seawater        | 10                                     | 139                | <i>Adv. Mater.</i> , <b>2020</b> , 33, 2003846                     |
| Ni <sub>2</sub> P-Fe <sub>2</sub> P/NF                                      | 1 M KOH + seawater        | 100                                    | 250                | <i>Adv. Funct. Mater.</i> , <b>2021</b> , 31, 2006484              |
| CoP <sub>x</sub> @FeOOH/NF                                                  | 1 M KOH + seawater        | 100                                    | 190                | <i>Appl. Catal. B</i> , <b>2021</b> , 294, 120256                  |
| Ni <sub>3</sub> N@C/NF                                                      | 1 M KOH + seawater        | 100                                    | 142                | <i>J. Mater. Chem. A</i> , <b>2021</b> , 9, 13562–13569            |
| RuV-CoNiP/NF                                                                | 1 M KOH + seawater        | 100                                    | 103                | <i>J. Mater. Chem. A</i> , <b>2021</b> , 9, 26852–26860            |

|                         |                       |      |     |                                                              |
|-------------------------|-----------------------|------|-----|--------------------------------------------------------------|
| NiFe-PBA-gel-<br>cal/GC | 1 M KOH +<br>seawater | 100  | 480 | <i>Adv. Sci.</i> , <b>2022</b> , <i>9</i> ,<br>2200146       |
| npNi/NF                 | 1 M KOH +<br>seawater | 100  | 256 | <i>Inorg. Chem.</i> , <b>2024</b> ,<br><i>63</i> , 5773–5778 |
|                         |                       | 1000 | 352 |                                                              |

**Table S5.** Comparison of overall water splitting performance for Ir@NiFe-MOF/NF with other reported bifunctional electrocatalysts.

| Catalysts                                                                   | Electrolyte               | Current density (mA cm <sup>-2</sup> ) | Cell Voltages (V) | Ref.                                                          |
|-----------------------------------------------------------------------------|---------------------------|----------------------------------------|-------------------|---------------------------------------------------------------|
| <b>Ir@NiFe-MOF/NF</b>                                                       | <b>1 M KOH + seawater</b> | <b>10</b>                              | <b>1.49</b>       | <b>This work</b>                                              |
|                                                                             |                           | <b>100</b>                             | <b>1.84</b>       |                                                               |
|                                                                             |                           | <b>500</b>                             | <b>2.43</b>       |                                                               |
| NiFe(OH) <sub>x</sub> @Ni <sub>3</sub> S <sub>2</sub> /MoS <sub>2</sub> -CC | 1 M KOH                   | 10                                     | 1.55              | <i>J. Mater. Chem. A</i> , <b>2019</b> , 7, 2895–2900         |
| NiNS/NF                                                                     | 1 M KOH                   | 100                                    | 1.93              | <i>J. Mater. Chem. A</i> , <b>2019</b> , 7, 8117–8121         |
| Ni-SN@C/GC                                                                  | 1 M KOH + seawater        | 10                                     | 1.72              | <i>Adv. Mater.</i> , <b>2021</b> , 33, 2007508                |
| FCNP@CQDs/C P                                                               | 1 M KOH + seawater        | 10                                     | 1.61              | <i>Appl. Catal. B</i> , <b>2023</b> , 326, 122403             |
| Er-MoO <sub>2</sub> /NF                                                     | 1 M KOH + seawater        | 10                                     | 1.52              | <i>Appl. Surf. Sci.</i> , <b>2023</b> , 615, 156360           |
| FMCO/NF                                                                     | 1 M KOH + seawater        | 10                                     | 1.58              | <i>Appl. Catal. B</i> , <b>2023</b> , 328, 122488             |
| Mo-CoP <sub>x</sub> /NF                                                     | 1 M KOH + seawater        | 100                                    | 2.16              | <i>Mater. Today, Nano</i> <b>2022</b> , 18, 100216            |
| Ni@CNTs-Mo <sub>x</sub> C/Ni <sub>2</sub> P/NF                              | 1 M KOH + seawater        | 10                                     | 1.56              | <i>Nano Energy</i> , <b>2023</b> , 111, 108440                |
| FeNiCoMnRu@CNT/CP                                                           | 1 M KOH + seawater        | 100                                    | 2.15              | <i>J. Colloid Interface Sci.</i> , <b>2023</b> , 646, 844–854 |
| Ru-CoV-LDH/NF                                                               | 1 M KOH + seawater        | 100                                    | 1.89              | <i>J. Mater. Chem. A</i> , <b>2021</b> , 9, 26852–26860       |
| Ru <sub>22</sub> NiMoP <sub>2</sub> /NF                                     | 1 M KOH + seawater        | 10                                     | 1.53              | <i>Sustain. Energy Fuels</i> , <b>2023</b> , 7, 4677–4686     |
